# Supplementary material
Source: PubMed Central journal article supplement (PMC4312499)
Supplement: NIHMS641317-supplement-Suppl__Table_1.pdf [file NIHMS641317-supplement-Suppl__Table_1.pdf]

---

**Supplementary Table 1.**

---

**S-ALL vs. D-ALL**

|          |                 | MPS              |           | Univariate |
|----------|-----------------|------------------|-----------|------------|
| L CA3/DG | t = 0.45        | p = 0.66         | t = -0.24 | p = 0.81   |
| L CA1    | t = 0.34        | p = 0.74         | t = 0.03  | p = 0.98   |
| L PHC    | t = 0.1         | p = 0.92         | t = 0.02  | p = 0.98   |
| R CA3/DG | <b>t = 3.29</b> | <b>p = 0.005</b> | t = -0.75 | p = 0.46   |
| R CA1    | t = -1.48       | p = 0.16         | t = -0.67 | p = 0.51   |
| R PHC    | t = 1.88        | p = 0.08         | t = 0.19  | p = 0.85   |

**S-C1&4 vs. S-C2&3**

|          |                 | MPS              |           | Univariate |
|----------|-----------------|------------------|-----------|------------|
| L CA3/DG | t = 1.42        | p = 0.176        | t = -0.3  | p = 0.772  |
| L CA1    | <b>t = 2.98</b> | <b>p = 0.009</b> | t = -0.04 | p = 0.965  |
| L PHC    | t = -0.14       | p = 0.888        | t = -0.75 | p = 0.466  |
| R CA3/DG | t = 1.07        | p = 0.301        | t = 0.33  | p = 0.749  |
| R CA1    | <b>t = 2.63</b> | <b>p = 0.019</b> | t = 0.18  | p = 0.863  |
| R PHC    | t = 2.86        | p = 0.012        | t = -0.61 | p = 0.553  |
